# Supplementary material for: Association of Gestational Hypertensive Disorders with Retinopathy of prematurity: A Systematic Review and Meta-analysis
Source: PubMed Central journal article supplement (PMC4974497; doi:10.1038/srep30732), 2016-08-05
Supplement: srep30732-s1.pdf [file srep30732-s1.pdf]

**Title: Association of Gestational Hypertensive Disorders with Retinopathy of prematurity: A Systematic Review and Meta-analysis**

**Author lists:** Priscilla Y.L. Chan, Shu-Min Tang, Sunny C.L. Au, Shi-Song Rong, Henry H.W. Lau, Simon T.C. Ko, Danny S.C. Ng, Li Jia Chen, Jason C.S. Yam

**Supplementary Table 1 Searching strategy**

**Supplementary Table1: Searching strategy in Medline and Embase**

---

- 1.exp "eclampsia and preeclampsia"/ or exp preeclampsia/
  - 2.preeclampsia/ or preeclampsia.mp.
  - 3.exp pregnancy toxemia/
  - 4.Edema Proteinuria Hypertension Gestosis.mp.
  - 5.pregnancy toxemia.mp.
  - 6.pregnancy toxemias.mp.
  - 7.gestational hypertension.mp. or exp maternal hypertension/
  - 8.1 or 2 or 3 or 4 or 5 or 6 or 7
  - 9.Retinopathy of Prematurity.mp. or exp retrolental fibroplasia/
  - 10.retrolental fibroplasia\*.mp.
  - 11.ROP.mp.
  - 12.neonatal outcome.mp.
  - 13.neurodevelopment outcome.mp.
  - 14.preterm outcome.mp.
  - 15.9 or 10 or 11 or 12 or 13 or 14
  - 16.8 and 15
-

**Supplementary Table 2. Checklist summarising compliance with MOOSE guidelines**

|                                                                                                                                                                                                                                                                              |                      |
|------------------------------------------------------------------------------------------------------------------------------------------------------------------------------------------------------------------------------------------------------------------------------|----------------------|
| Reporting background should include                                                                                                                                                                                                                                          |                      |
| Problem definition                                                                                                                                                                                                                                                           | Yes                  |
| Hypothesis statement                                                                                                                                                                                                                                                         | Yes                  |
| Description                                                                                                                                                                                                                                                                  | Yes                  |
| Type of exposure or intervention used                                                                                                                                                                                                                                        | Yes                  |
| Type of study designs used                                                                                                                                                                                                                                                   | Yes                  |
| Study population                                                                                                                                                                                                                                                             | Yes                  |
| Reporting of search strategy should include                                                                                                                                                                                                                                  |                      |
| Qualifications of searches (e.g. librarians and investigators)                                                                                                                                                                                                               | Yes                  |
| Search strategy, including time period included in the synthesis and keywords                                                                                                                                                                                                | Yes                  |
| Effort to include all available studies, including contact with authors                                                                                                                                                                                                      | Yes                  |
| Databases and registries searched                                                                                                                                                                                                                                            | Yes                  |
| Search software used, name and version, including special features                                                                                                                                                                                                           | Yes                  |
| Use of hand searching (e.g. reference lists of obtained articles)                                                                                                                                                                                                            | Yes                  |
| List of citations located and those excluded including justification                                                                                                                                                                                                         | Available on request |
| Method of addressing articles published in languages other than English                                                                                                                                                                                                      | Yes                  |
| Method of handling abstracts and unpublished studies                                                                                                                                                                                                                         | Yes                  |
| Description of any contact with authors                                                                                                                                                                                                                                      | No                   |
|                                                                                                                                                                                                                                                                              |                      |
| Description of relevance or appropriateness of studies assembled for assessing the hypothesis to be tested                                                                                                                                                                   | Yes                  |
| Rationale for the selection and coding of data (eg, sound clinical principles or convenience)                                                                                                                                                                                | Yes                  |
| Documentation of how data were classified and coded (eg, multiple raters, blinding, and interrater reliability)                                                                                                                                                              | Yes                  |
| Assessment of confounding (eg, comparability of cases and controls in studies where appropriate)                                                                                                                                                                             | Yes                  |
| Assessment of study quality, including blinding of quality assessors; stratification or regression on possible predictors of study results                                                                                                                                   | Yes                  |
| Assessment of heterogeneity                                                                                                                                                                                                                                                  | Yes                  |
| Description of statistical methods (eg, complete description of fixed or random effects models, justification of whether the chosen models account for predictors of study results, dose-response models, or cumulative meta-analysis) in sufficient detail to be replicated | Yes                  |
| Provision of appropriate tables and graphics                                                                                                                                                                                                                                 | Yes                  |
|                                                                                                                                                                                                                                                                              |                      |
| Graphic summarizing individual study estimates and overall estimate                                                                                                                                                                                                          | Yes                  |
| Table giving descriptive information for each study included                                                                                                                                                                                                                 | Yes                  |
| Results of sensitivity testing (eg, subgroup analysis)                                                                                                                                                                                                                       | Yes                  |
| Indication of statistical uncertainty of findings                                                                                                                                                                                                                            | Yes                  |
| Reporting of discussion should include                                                                                                                                                                                                                                       |                      |
| Quantitative assessment of bias (eg, publication bias)                                                                                                                                                                                                                       | Yes                  |
| Justification for exclusion (eg, exclusion of non-English-language citations)                                                                                                                                                                                                | Yes                  |
| Assessment of quality of included studies                                                                                                                                                                                                                                    | Yes                  |
| Reporting of conclusions should include                                                                                                                                                                                                                                      |                      |
| Consideration of alternative explanations for observed results                                                                                                                                                                                                               | Yes                  |
| Generalization of the conclusions (ie, appropriate for the data presented and within the domain of the literature review)                                                                                                                                                    | Yes                  |
| Guidelines for future research                                                                                                                                                                                                                                               | Yes                  |
| Disclosure of funding source                                                                                                                                                                                                                                                 | Yes                  |
